# Supplementary material
Source: PubMed Central journal article supplement (PMC3302360)
Supplement: supp_95.4.818_ajcn027383-ST1-ST2.pdf [file supp_95.4.818_ajcn027383-ST1-ST2.pdf]

**Supplemental Material Table 1.** Comparison of regional brain activation in response to food > non-food stimuli after a period of restricted sleep.<sup>1</sup>

| Anatomical Region         | Brodmann Area | Clusters (voxels) | Z score | Montreal Neurological Institute Coordinates |                |                |
|---------------------------|---------------|-------------------|---------|---------------------------------------------|----------------|----------------|
|                           |               |                   |         | x <sup>a</sup>                              | y <sup>b</sup> | z <sup>c</sup> |
| Cuneus                    | 18            | 10                | 2.52    | -26                                         | -72            | 12             |
| Inferior Frontal Gyrus    | 13            | 46                | 2.81    | 38                                          | 12             | -10            |
| Inferior Frontal Gyrus    | 47            | 82                | 2.86    | -34                                         | 20             | -2             |
| Superior Temporal Gyrus   | 47            |                   | 2.58    | -48                                         | 14             | -4             |
| *Inferior Parietal Lobule | 7/40          | 1065              | 3.88    | -36                                         | -64            | 46             |
| *Precuneus                | 19            |                   | 3.14    | -24                                         | -84            | 42             |
| *Inferior Parietal Lobule | 39/40         | 2004              | 3.75    | 40                                          | -68            | 42             |
| *Precuneus                | 39            |                   | 3.59    | 30                                          | -62            | 42             |
| Inferior Parietal Lobule  | 40            | 12                | 2.51    | -58                                         | -52            | 40             |
| Inferior Temporal Gyrus   | 20/21         | 23                | 2.82    | -48                                         | 0              | -38            |
| Insula                    | 13            | 27                | 2.61    | -36                                         | 4              | -6             |
| *Insula                   | 13            | 158               | 3.06    | -42                                         | -10            | 10             |
| Lateral Ventricle         |               | 38                | 2.78    | 34                                          | -60            | 0              |
| Lateral Ventricle         |               | 58                | 2.80    | 24                                          | -34            | -2             |
| Lentiform nucleus/Putamen |               | 39                | 2.71    | -20                                         | 4              | 4              |
| *Lingual Gyrus            | 18            | 5943              | 4.44    | 16                                          | -82            | -12            |
| *Middle Occipital Gyrus   | 18            |                   | 3.92    | 14                                          | -96            | 10             |
| *Middle Frontal Gyrus     | 8/10          | 10389             | 4.48    | -50                                         | 10             | 46             |

|                          |       |     |      |     |     |     |
|--------------------------|-------|-----|------|-----|-----|-----|
| *Cingulate Gyrus         | 23    |     | 4.40 | 4   | -36 | 28  |
| *Middle Frontal Gyrus    | 10    |     | 4.06 | -34 | 54  | 4   |
| *Middle Frontal Gyrus    | 11    | 150 | 4.26 | -28 | 36  | -16 |
| *Middle Temporal Gyrus   | 21    | 143 | 3.09 | 64  | -34 | -12 |
| Paracentral Lobule       | 6     | 17  | 2.50 | 6   | -36 | 62  |
| Parahippocampal gyrus    |       | 31  | 2.79 | 32  | -10 | -14 |
| Postcentral Gyrus        | 40    | 45  | 2.83 | -64 | -20 | 14  |
| *Precentral Gyrus        | 44/45 | 96  | 3.00 | -58 | 12  | 10  |
| Inferior Frontal Gyrus   | 44    |     | 2.47 | -60 | 6   | 20  |
| Precuneus                | 7     | 74  | 2.69 | 6   | -64 | 38  |
| Precuneus                | 7     | 26  | 2.56 | 14  | -72 | 38  |
| *Pyramis                 |       | 266 | 3.80 | 8   | -68 | -32 |
| Nodule                   |       |     | 2.88 | -4  | -62 | -32 |
| Culmen                   |       |     | 2.88 | 2   | -48 | -26 |
| *Superior Frontal Gyrus  | 9/10  | 231 | 3.39 | -22 | 46  | 42  |
| Medial Frontal Gyrus     | 9     |     | 2.58 | -8  | 42  | 28  |
| Superior Frontal Gyrus   | 9     | 23  | 2.56 | 22  | 46  | 42  |
| Superior Occipital Gyrus | 19    | 12  | 2.46 | -30 | -76 | 24  |
| Thalamus/Pulvinar        |       | 10  | 2.47 | -16 | -32 | 10  |

<sup>1</sup> Contrasts for food > nonfood were performed for each subject and averaged, n = 26.

Thresholds for active brain regions were set at a cluster extent of at least 10 voxels and a voxel-level  $P < 0.01$ . Statistical analyses were performed using SPM5. \* Regions with voxel-level  $P \leq 0.001$ .

a: Positive x-coordinate indicates right hemisphere

b: Positive y-coordinate indicates anterior to commissure landmark

c: Positive z-coordinate indicates above anterior-posterior commissure line

**Supplemental Material Table 2.** Comparison of regional brain activation in response to food > nonfood stimuli after a period of restricted sleep > habitual sleep.<sup>1</sup>

| Anatomical Region            | Brodmann Area | Clusters (voxels) | Z score | Montreal Neurological Institute Coordinates |                |                |
|------------------------------|---------------|-------------------|---------|---------------------------------------------|----------------|----------------|
|                              |               |                   |         | x <sup>a</sup>                              | y <sup>b</sup> | z <sup>c</sup> |
|                              |               |                   |         |                                             |                |                |
| Caudate/Nucleus accumbens    |               | 14                | 2.57    | -12                                         | 14             | -10            |
| Cingulate Gyrus              |               | 18                | 2.78    | -10                                         | -10            | 32             |
| Corpus Callosum <sup>1</sup> |               | 28                | 2.60    | 6                                           | -34            | 14             |
| Corpus Callosum              |               | 12                | 2.59    | 8                                           | -18            | 26             |
| Culmen                       |               | 19                | 2.72    | -10                                         | -68            | -8             |
| *Inferior Frontal Gyrus      | 44            | 394               | 3.42    | 50                                          | -2             | 22             |
| Middle Frontal Gyrus         | 9             |                   | 2.65    | 50                                          | 24             | 36             |
| *Inferior Frontal Gyrus      | 46            | 150               | 3.35    | 48                                          | 40             | 12             |
| *Inferior Frontal Gyrus      | 10            | 162               | 3.21    | -40                                         | 48             | 4              |
| *Middle Frontal Gyrus        | 10            |                   | 3.20    | -40                                         | 56             | 2              |
| Inferior Frontal Gyrus       | 47            | 119               | 2.95    | -42                                         | 18             | 0              |
| Inferior Frontal Gyrus       | 13/45/47      | 89                | 2.74    | 50                                          | 20             | 8              |
| *Inferior Parietal Lobule    | 7/19          | 167               | 3.16    | -36                                         | -62            | 46             |
| *Inferior Parietal Lobule    | 40            | 63                | 3.13    | -58                                         | -54            | 38             |
| Insula                       | 13            | 40                | 2.94    | 32                                          | 4              | 12             |
| Inferior Frontal Gyrus       |               |                   | 2.52    | 38                                          | 6              | 20             |
| Insula                       | 13            | 50                | 2.89    | -36                                         | -8             | 6              |

---

|                               |    |     |      |     |     |     |
|-------------------------------|----|-----|------|-----|-----|-----|
| Clastrum                      | 13 |     | 2.69 | -32 | 0   | 6   |
| Insula                        | 13 | 21  | 2.63 | -40 | -26 | 14  |
| Insula                        | 13 | 13  | 2.58 | -28 | -18 | 22  |
| *Lateral Ventricle/Corpus     |    | 55  | 3.08 | -12 | -26 | 26  |
| Callosum                      |    |     |      |     |     |     |
| Lentiform Nucleus/Putamen     |    | 46  | 2.92 | 28  | -6  | 10  |
| Lingual Gyrus                 | 18 | 18  | 2.54 | 12  | -74 | -2  |
| *Medial Frontal Gyrus         | 10 | 71  | 3.22 | -18 | 68  | -2  |
| *Superior Frontal Gyrus       | 10 |     | 2.99 | -26 | 64  | -4  |
| *Medial Frontal Gyrus         | 10 | 78  | 2.97 | 2   | 60  | 26  |
| *Middle Frontal Gyrus         | 6  | 231 | 3.34 | -18 | -2  | 64  |
| Superior Frontal Gyrus        | 6  |     | 2.87 | -20 | 12  | 64  |
| *Middle Frontal Gyrus         | 9  | 122 | 3.07 | 36  | 36  | 42  |
| *Middle Frontal Gyrus         | 9  | 67  | 3.56 | 32  | 8   | 32  |
| *Middle Frontal Gyrus         | 9  | 88  | 3.19 | -34 | 36  | 42  |
| Superior Frontal Gyrus        | 9  |     | 2.73 | -22 | 48  | 40  |
| Middle/Inferior Frontal Gyrus | 8  | 75  | 2.83 | -24 | 12  | 32  |
| Middle Frontal Gyrus          |    | 50  | 2.82 | 30  | 40  | -10 |
| Middle Frontal Gyrus          |    | 17  | 2.77 | 20  | -20 | 66  |
| *Middle Occipital Gyrus       | 30 | 453 | 3.69 | -28 | -74 | 10  |
| *Cuneus                       | 18 |     | 3.12 | -18 | -80 | 14  |
| Nucleus                       |    | 24  | 2.93 | 12  | 14  | -8  |
| accumbens/Putamen             |    |     |      |     |     |     |

---

|                            |       |     |      |     |     |     |
|----------------------------|-------|-----|------|-----|-----|-----|
| *Paracentral Lobule        | 9     | 138 | 3.42 | 8   | -36 | 64  |
| Paracentral Lobule         | 5     | 31  | 2.69 | -6  | -48 | 60  |
| *Precentral Gyrus          | 6     | 323 | 3.33 | -48 | 0   | 50  |
| *Middle Frontal Gyrus      | 6     |     | 3.16 | -50 | 10  | 46  |
| Inferior Frontal Gyrus     | 9     |     | 2.90 | -48 | 8   | 38  |
| Precentral Gyrus           | 44    | 50  | 2.97 | -58 | 12  | 8   |
| *Precuneus                 | 19    | 160 | 3.79 | -24 | -84 | 42  |
| Subcallosal Gyrus          | 34    | 13  | 2.86 | -22 | 6   | -16 |
| *Superior Frontal Gyrus    | 8     | 180 | 3.62 | 6   | 32  | 50  |
| *Superior Frontal Gyrus    | 10    | 111 | 3.09 | 8   | 70  | 2   |
| Superior Frontal Gyrus     | 6     | 224 | 2.94 | 2   | 8   | 54  |
| Superior Frontal Gyrus     | 6     | 190 | 2.86 | 24  | 4   | 54  |
| Superior Frontal Gyrus     | 8     | 17  | 2.58 | -22 | 28  | 56  |
| Superior Frontal Gyrus     | 9     | 23  | 2.71 | -12 | 50  | 26  |
| *Superior Temporal Gyrus   | 22/42 | 214 | 3.29 | -62 | -28 | 12  |
| *Superior Temporal Gyrus   | 22    | 48  | 3.08 | 58  | -6  | 2   |
| *Supramarginal Gyrus       | 40    | 592 | 3.31 | 52  | -40 | 36  |
| *Thalamus                  |       | 306 | 3.41 | -18 | -36 | 10  |
| *Thalamus                  |       | 198 | 3.34 | 6   | -10 | 6   |
| *Transverse Temporal Gyrus | 41    | 769 | 3.32 | 44  | -22 | 10  |
| *Insula                    | 13    |     | 3.30 | 32  | -30 | 20  |

<sup>1</sup> Contrasts for food > nonfood were performed for each subject and averaged, n = 26.

Thresholds for active brain regions were set at a cluster extent of at least 10 voxels and

a voxel-level  $P < 0.01$ . Following individual analyses, a paired t-test for group analysis was performed using the same statistical parameters to compare regional brain activity with food > nonfood for restricted sleep > habitual sleep. Statistical analyses were performed using SPM5. \* Regions with voxel-level  $P \leq 0.001$ .

a: Positive x-coordinate indicates right hemisphere

b: Positive y-coordinate indicates anterior to commissure landmark

c: Positive z-coordinate indicates above anterior-posterior commissure line
